# Supplementary material for: Coccolithophore fluxes in the open tropical North Atlantic: influence of the Amazon river and of Saharan dust deposition
Source: Copernicus journal article supplement (doi:10.5194/bg-2017-216), 2017-06-14
Supplement: Supplementary file 1 [file bg-2017-216-supplement.pdf]

## Supplementary Material

### Taxonomy of coccolithophores

For taxonomic references, see Jordan et al. (2004)

5 **Kingdom CHROMISTA** Cavalier-Smith, 1986

**Division HAPTOPHYTA** Hibberd, 1972

**Class PRYMNESIOPHYCEAE** Hibbert, 1976 emend. Cavalier-Smith et al., 1996

**Order COCCOLITHALES** Schwartz, 1932 emend. Edvardsen et al., 2000

Family CALCIDISCACEAE Young and Bown, 1997

10 Genus *Calcidiscus* Kamptner, 1950

*Calcidiscus leptoporus* (Murray and Blackman, 1898) Loeblich and Tappan, 1978

Genus *Hayaster* Bukry 1973

*Hayaster perplexus* (Bramlette and Riedel 1954) Bukry 1973

Genus *Oolithotus* Reinhardt in Cohen and Reinhardt 1968

15 *Oolithotus antillarum* (Cohen 1964) Reinhardt in Cohen and Reinhardt 1968

*Oolithotus fragilis* (Lohmann 1912) Martini and Müller 1972

Genus *Umbilicosphaera* Lohmann, 1902

*Umbilicosphaera anulus* (Lecal 1967) Young and Geisen in Young et al. 2003

*Umbilicosphaera foliosa* (Kamptner 1963 ex Kleijne 1993) Geisen in Sáez et al. 2003b

20 *Umbilicosphaera hulburtiana* Gaarder 1970

*Umbilicosphaera sibogae* (Weber-van Bosse 1901) Gaarder 1970

**Order ISOCHRYSIDALES** Pascher, 1910 emend. Edvardsen and Eikrem in Edvardsen et al., 2000

Family NOELAERHABDACEAE Jerkovic, 1970 emend. Young and Bown, 1997

Genus *Emiliana* Hay and Mohler in Hay et al., 1967

25 *Emiliana huxleyi* (Lohmann, 1902) Hay and Mohler, 1967

Genus *Gephyrocapsa* Kamptner, 1943

*Gephyrocapsa ericsonii* McIntyre and Bé, 1967

*Gephyrocapsa muelleriae* Bréhéret, 1978

*Gephyrocapsa oceanica* Kamptner, 1943

30 Genus *Reticulofenestra* Hay et al. 1966

*Reticulofenestra sessilis* (Lohmann 1912) Jordan and Young 1990

**Order SYRACOSPHAERALES** Hay, 1977 emend. Young et al., 2003

Family CALCIOSOLENIACEAE Kamptner 1937

Genus *Calciosolenia* Gran 1912; emend. Young et al. 2003 (35)

35 *Calciosolenia brasiliensis* (Lohmann 1919) Young in Young et al. 2003

*Calciosolenia murrayi* Gran 1912

Family RHABDOSPHAERACEAE Haeckel 1894

- Genus *Acanthoica* Lohmann 1903; emend. Schiller 1913, Kleijne 1992  
*Acanthoica quattrosolina* Lohmann 1903
- Genus *Algirosphaera* Schlauder 1945; emend. Norris 1984  
*Algirosphaera robusta* (Lohmann 1902) Norris 1984
- 5 Genus *Discosphaera* Haeckel 1894  
*Discosphaera tubifera* (Murray and Blackman 1898) Ostenfeld 1900
- Genus *Palusphaera* Lecal 1966a; emend. Norris 1984  
*Palusphaera vandellii* Lecal 1966a; emend. Norris 1984
- Genus *Rhabdosphaera* Haeckel 1894
- 10 *Rhabdosphaera clavigera* Murray and Blackman 1898  
*Rhabdosphaera clavigera* Murray and Blackman 1898  
*Rhabdosphaera xiphos* (Deflandre and Fert 1954) Norris 1984
- Family SYRACOSPHAERACEAE (Lohmann, 1902) Lemmermann, 1903
- Genus *Ophiaster* Gran 1912; emend. Manton and Oates 1983b
- 15 Genus *Syracosphaera* Lohmann, 1902  
*Syracosphaera anthos* (Lohmann 1912) Janin 1987  
*Syracosphaera lamina* Lecal-Schlauder 1951  
*Syracosphaera molischii* Schiller 1925  
*Syracosphaera pulchra* Lohmann, 1902
- 20 **GENERA INCERTAE SEDIS**  
Families with possible affinities to the Syracosphaerales
- Family ALISPHAERACEAE Young, Kleijne and Cros in Young et al. 2003
- Genus *Alisphaera* Heimdal 1973; emend. Jordan and Chamberlain 1993a; Kleijne et al. 2002  
*Alisphaera unicornis* Okada and McIntyre 1977
- 25 Family UMBELLOSPHAERACEAE Young and Kleijne in Young et al. 2003
- Genus *Umbellosphaera* Paasche in Markali and Paasche 1955  
*Umbellosphaera irregularis* Paasche in Markali and Paasche 1955  
*Umbellosphaera tenuis* (Kamptner 1937) Paasche in Markali and Paasche 1955
- Genera with possible affinities with the Syracosphaerales
- 30 Genus *Coronosphaera* Gaarder in Gaarder and Heimdal 1977  
*Coronosphaera mediterranea* (Lohmann 1902) Gaarder in Gaarder and Heimdal 1977
- Order ZYGODISCALES** Young and Bown, 1997
- Family HELICOSPHAERACEAE Black, 1971 emend. Jafar and Martini, 1975
- Genus *Helicosphaera* Kamptner, 1954
- 35 *Helicosphaera carteri* (Wallich 1877) Kamptner 1954  
*Helicosphaera hyalina* Gaarder 1970  
*Helicosphaera wallichii* (Lohmann 1902) Okada and McIntyre 1977

Family PONTOSPHAERACEAE Lemmermann 1908

Genus *Pontosphaera* Lohmann 1902

*Pontosphaera multipora* (Kamptner 1948) Roth 1970

*Pontosphaera syracusana* Lohmann 1902

5 Genus *Scyphosphaera* Lohmann 1902

*Scyphosphaera apsteinii* Lohmann 1902

### **HOLOCOCCOLITH-BEARING TAXA**

Family CALYPTROSPHAERACEAE Boudreaux and Hay 1969

Genus *Syracolithus* (Kamptner 1941) Deflandre 1952

10 *Syracolithus dalmaticus* (Kamptner 1927) Loeblich Jr. and Tappan 1966

*Syracolithus schilleri* (Kamptner 1927) Kamptner 1956

### **NANNOLITH-BEARING FAMILIES**

Family CERATOLITHACEAE Norris 1965

Genus *Ceratolithus* Kamptner 1950

15 *Ceratolithus cristatus* Kamptner 1950

### **NANNOLITH-BEARING GENERA INCERTAE SEDIS**

Genus *Florisphaera* Okada and Honjo 1973

*Florisphaera profunda* var. *elongata* Okada and McIntyre 1980

*Florisphaera profunda* Okada and Honjo 1973 var. *profunda*

20 Genus *Gladiolithus* Jordan and Chamberlain 1993b

*Gladiolithus flabellatus* (Halldal and Markali 1955) Jordan and Chamberlain 1993b

25

30
